# Supplementary material for: Fast descent routes from within or near the stratosphere to the surface at Fukuoka, Japan, studied using 7 Be measurements and trajectory calculations
Source: Copernicus journal article supplement (doi:10.5194/acp-16-6241-2016), 2016-05-24
Supplement: Supplementary file 1 [file acp-16-6241-2016-supplement.zip]

Archive with 4 entries (4 files):
- sup_figall.pdf
- supplement_160419.pdf
- supplement_160419.tex
- acp-16-6241-2016-supplement-title-page.pdf
