# Supplementary material for: Fast descent routes from within or near the stratosphere to the surface at Fukuoka, Japan, studied using 7 Be measurements and trajectory calculations
Source: Copernicus journal article supplement (doi:10.5194/acp-16-6241-2016), 2016-05-24
Supplement: Supplementary file 1 [file acp-16-6241-2016-supplement.zip › acp-16-6241-2016-supplement-title-page.pdf]

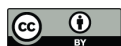

## *Supplement of*

# **Fast descent routes from within or near the stratosphere to the surface at Fukuoka, Japan, studied using $^7\text{Be}$ measurements and trajectory calculations**

**Hisanori Itoh and Yukinori Narazaki**

*Correspondence to:* Hisanori Itoh (ito@weather.geo.kyushu-u.ac.jp)

- [acp-16-6241-2016-supplement-title-page.pdf](#)
- [sup\\_figall.pdf](#)
- [supplement\\_160419.pdf](#)
- [supplement\\_160419.tex](#)

The copyright of individual parts of the supplement might differ from the CC-BY 3.0 licence.
