# Supplementary material for: Fast descent routes from within or near the stratosphere to the surface at Fukuoka, Japan, studied using 7 Be measurements and trajectory calculations
Source: Copernicus journal article supplement (doi:10.5194/acp-16-6241-2016), 2016-05-24
Supplement: Supplementary file 1 [file acp-16-6241-2016-supplement.zip › supplement_160419.tex]

% fastest descent route
%\documentclass[a4j,12pt]{article}
%\documentclass[acpd, online, hvmath]{copernicus}
\documentclass[journal abbreviation, manuscript]{copernicus}

%\renewcommand{\baselinestretch}{1.5}
%\usepackage[dviout]{graphicx}
%\usepackage{color}
%\usepackage[hang,small,bf]{caption}
%\usepackage{comment}
%\usepackage{here}


\def\rf
 {\smallbreak\par\noindent\hangindent=1pc\hangafter=1}
\def\n{\noindent}
\def\popt{{\partial \over \partial t}}
\def\dlp{\Delta p}
\def\half{{1 \over 2}}
\def\dhalf{${1 \over 2}$}
\def\pop#1#2{{\partial #1 \over \partial #2}}
\def\tabrule{\noalign{\hrule}}

\makeatletter
\def\eqnarray{%
 \stepcounter{equation}%
 \let\@currentlabel=\theequation
 \global\@eqnswtrue
 \global\@eqcnt\z@
 \tabskip\@centering
 \let\\=\@eqncr
 $$\halign to \displaywidth\bgroup\@eqnsel\hskip\@centering
 $\displaystyle\tabskip\z@{##}$&\global\@eqcnt\@ne
 \hfil$\displaystyle{{}##{}}$\hfil
 &\global\@eqcnt\tw@$\displaystyle\tabskip\z@{##}$\hfil
 \tabskip\@centering&\llap{##}\tabskip\z@\cr}
\makeatother


\begin{document}
\setlength{\baselineskip}{20pt}

\noindent
\textbf{\Large Detail of case selection for analysis}
\vskip 0.3cm

   In this material, we explain how to select cases for analysis in detail, using the highest altitude among all trajectories ($\hat{z}_1$) and the top-1\% average of the highest reached altitude of each trajectory ($\hat{z}_{\mathrm{a}}$). As to their more detailed definitions, see subsection 3.2.

   Some results of backward trajectory analysis are shown in Fig.~\ref{fig:example}, which shows the time variations of $\hat{z}_1$ and $\hat{z}_{\mathrm{a}}$.
   When the averaging time (sampling interval) is one day, backward trajectories are calculated five times (00:00, 06:00, 12:00, 18:00, and 24:00\,\unit{UTC}), and the objects
   for analysis are the time when $\hat{z}_{\mathrm{a}}$ is the maximum and
   $\hat{z}_1 \ge 8000$\,\unit{m} among the five times.  Thus, in the 
   example that a high-concentration day is isolated (Fig.~\ref{fig:example}a), the time (18:00\,\unit{UTC}) when $\hat{z}_{\mathrm{a}}$ is the maximum and $\hat{z}_1$ is greater than 8000\,\unit{m} is selected.
   This time is enclosed by a red square in Fig~\ref{fig:example}a to distinguish from the other times.
   High-concentration days sometimes continue consecutively. This example is shown in Fig.~\ref{fig:example}b. 
   Even in this case, the selection rule is the same as that in isolated high-concentration days.
   In this case, therefore, 06:00\,\unit{UTC} 1 and 00:00\,\unit{UTC} 2~June are selected as objects for analysis. Although 00:00\,\unit{UTC} 2 June is common between 1 and 2 June, we can regard that 06:00\,\unit{UTC} 1 (00:00\,\unit{UTC} 2) June is selected for the first (second) day.
   Even when the averaging time is longer than one day, the selection rule
   is basically the same; all times when $\hat{z}_{\mathrm{a}}$ is a~local maximum and $\hat{z}_1 \ge 8000$\,\unit{m}
   between sampling intervals are chosen.  However, when the two maxima of
   $\hat{z}_{\mathrm{a}}$ are separated for only 12\,\unit{h}, that is, only one
   calculation is \lq \lq slipped'' in between, only one time (obviously that with
   larger $\hat{z}_{\mathrm{a}}$) is selected.  Thus, in the example of Fig.~\ref{fig:example}c, 12:00\,\unit{UTC} 3, 18:00\,\unit{UTC}
   4, and 00:00\,\unit{UTC} 6~May are selected.  
   Although $\hat{z}_{\mathrm{a}}$ attains its local maximum at 00:00\,\unit{UTC} 3~May, this time is not selected, because this time is separated for only 12 h from 12:00\,\unit{UTC}. A~comparison of these results
   reveals that the case at 12:00\,\unit{UTC} 2~June 2009 shows a local maximum for
   $\hat{z}_1$ in Fig.~\ref{fig:example}b, whereas $\hat{z}_{\mathrm{a}}$ attains the maximum at
   00:00\,\unit{UTC} 2~June, showing a~monotonic decrease around 12:00\,\unit{UTC} 2.  Therefore, using
   both $\hat{z}_1$ and $\hat{z}_{\mathrm{a}}$ is preferable.

   Thus, 33 times (cases) are finally selected.
   The details of these cases are shown in Table~\ref{table:allcases}.  The
   numerals prior to the time are expressed as the case numbers; for example, the
   case of 00:00\,\unit{UTC} 18~March 2009 is referred to as case 1.  The maxima
   of the potential vorticity (PV) of parcels on trajectories are also
   shown. Since PV is given at isentropic surfaces in the JRA-55 data, PV at arbitrary points is obtained by interpolation. 
   The values are all more than 2 PVU
   ($10^{-6}$\,\unit{m^2\,s^{-1}\,K\,kg^{-1}}); the minimum is 2.35\,PVU for
   case 24, and 30 cases exceed 3\,PVU. %Because 2 PVU is said to be an index of   stratospheric air (e.g., Hoskins et~al., 1985; Wernli and Bourqui, 2002;   Sprenger and Wernli, 2003), all cases have the characteristic of   stratospheric air in terms of PV.  As PV is not well conserved (not shown),   the Lagrangian time changes of PV are not mentioned in the following   analyses.


   Finally, we explain case 1, which is taken as a typical high-latitude route in subsection 4.2.1.
   Because case 1 (starting time of 00:00\,\unit{UTC} 18~March 2009) listed in Table~\ref{table:allcases} has the highest $\hat{z}_{\mathrm{a}}$ among high-latitude routes, it may be the best case for analysis.
However, in this case, several trajectories among the top-1\,\unit{\%} backward trajectories are from the mid-latitudes, which are markedly different from the other high-latitude routes. That is, routes are roughly divided into the two kinds (not shown).
Thus, this case cannot be considered typical. We then substitute the case starting at 18:00\,\unit{UTC} 17~March 2009, i.e., 6\,\unit{h} before case 1.
In this case, all of the top-1\,\unit{\%} backward trajectories are from high latitudes.
$\hat{z}_1,\ \hat{z}_{\mathrm{a}}$, and the maximum PV are 9722, 9157\,\unit{m}, and 8.63 PVU, respectively. The former two are nearly the same as those in case 1 (Table~\ref{table:allcases}). The PV is much larger than that in case 1 and is the largest among the 33 cases. In terms of PV, we can say that the trajectories start from the stratosphere. Therefore, as a~representative of the high-latitude route, this case gives clearer results than case 1,
being simply referred to as case 1 in subsection 4.2.1.

\clearpage
% Table 1
\begin{table}[t]
\caption{%
Objects for analysis of fast descent routes in which $\hat{z}_1 \ge 8000$\,\unit{m} and the maxima of $\hat{z}_{\mathrm{a}}$ are satisfied. The numerals before the time indicate the case numbers, which are ordered in time. Numerals below the time indicate $\hat{z}_1$ (m), $\hat{z}_{\mathrm{a}}$ (m), and maximum of potential vorticity (PVU) in order.}
\label{table:allcases}
\scalebox{.750}[.750]
{\begin{tabular}
%{\textwidth}
{p{5mm}lp{5mm}lp{5mm}lp{5mm}l}
\tophline
 \multicolumn{2}{l}{March}               & \multicolumn{2}{l}{April} & \multicolumn{2}{l}{May} & \multicolumn{2}{l}{Others} \\
\middlehline
 {1.}& 00:00\,\unit{UTC} 18, 2009     & {8.}& 00:00\,\unit{UTC} 6, 2010 & {2.}& 00:00\,\unit{UTC} 2, 2009 & {5.}& 06:00\,\unit{UTC} 1~Jun 2009 \\
 & 9851, 9240, 6.27 & & 9231, 8755, 4.53 & & 8895, 8394, 4.97 & & 9987, 9199, 4.32 \\ \cline{1-2}
 {15.}& 18:00\,\unit{UTC} 19, 2011     & {9.}& 00:00\,\unit{UTC} 9, 2010 & {3.}& 06:00\,\unit{UTC} 3, 2009 & {6.}& 00:00\,\unit{UTC} 2~Jun 2009 \\
 & 8752, 8379, 3.90        & & 8410, 8275, 3.56    & & 9291, 8574, 3.82   & & 10\,498 9157 5.31  \\
 {16.}& 18:00\,\unit{UTC} 31, 2011     & {10.}&12:00\,UTC 27, 2010 & {4.}& 12:00\,\unit{UTC} 5, 2009 & {7.}& 18:00\,\unit{UTC} 25 Dec 2009 \\
 & 8450, 7903, 4.97        & & 9228, 7104, 5.77    & & 9937, 9240, 4.56   & & 10\,585, 10\,025, 5.27  \\ \cline{1-8}
 {22.}& 00:00\,\unit{UTC} 11, 2012     & {17.}& 18:00\,\unit{UTC} 14, 2011 &  {11.}& 12:00\,\unit{UTC} 3, 2010 & {14.}& 18:00\,\unit{UTC} 27 Nov 2010 \\
 & 8297, 7376, 4.17        & & 10\,475, 9355, 4.21   & & 8374, 8108, 5.77  & & 8410, 7668, 3.84  \\ \cline{1-2} \cline{7-8}
 {25.}& 12:00\,\unit{UTC} 9, 2013      & {18.}& 12:00\,\unit{UTC} 17, 2011 & {12.}& 18:00\,\unit{UTC} 4, 2010 & {21.}& 00:00\,\unit{UTC} 5 Dec 2011 \\
 & 9379, 8762, 2.77        & & 8407, 8135, 5.42    & & 8363, 8028, 4.38   & & 8127, 7203, 3.40   \\ \cline{3-4} \cline{7-8}
 {26.}& 06:00\,\unit{UTC} 10, 2013     & {23.}& 18:00\,\unit{UTC} 7, 2012  & {13.}& 00:00\,\unit{UTC} 6, 2010 & {24.}& 00:00\,\unit{UTC} 7 Jan 2013 \\
 & 8979, 8792, 2.42        & & 8150, 7844, 4.69    & & 8714, 8326, 6.16   & & 8211, 8116, 2.35      \\ \cline{3-6}
 {27.}& 18:00\,\unit{UTC} 12, 2013     & {30.}& 18:00\,\unit{UTC} 15, 2013  & {19.}& 12:00\,\unit{UTC} 16, 2011  & {32.}& 12:00\,\unit{UTC} 25 Oct 2013 \\
 & 10\,084, 8898, 6.52  & & 9328, 8756, 5.17 & & 8439, 8229, 5.87     & & 9217, 8321, 7.61 \\
 {28.}& 12:00\,\unit{UTC} 22, 2013     & {31.}& 12:00\,\unit{UTC} 30, 2013  & {20.}& 00:00\,\unit{UTC} 20, 2011  &  \\
 & 8115, 7787, 5.36  & & 8887, 8208, 3.42     & & 10\,683, 9938, 6.64 &  \\ \cline{3-6}
 {29.}& 00:00\,\unit{UTC} 23, 2013     &                  && {33.}& 00:00\,\unit{UTC} 18, 2014 & \\
 & 8266, 7724, 5.30        &                  & && 8988, 8664, 5.28    & \\ \bottomhline
\end{tabular}}
\end{table}

\clearpage
% Fig. 1
\begin{figure*}[t]
\centering\includegraphics[width=14cm,clip,bb=130 180 550 700]{sup_figall.pdf}
\caption{Figure for explaining the case (time) selection for analysis. Examples that \textbf{(a)} a high-concentration day is isolated, \textbf{(b)} high-concentration days are consecutive, and \textbf{(c)} the averaging time (sampling interval) is three days are illustrated. Time variations of $\hat{z}_1$ (red line) and $\hat{z}_a$ (blue line) of backward trajectory analysis from \textbf{(a)} 4~April 2011, \textbf{(b)} 1 and 2~June 2009, and \textbf{(c)} 3 to 5~May 2010 are shown. The abscissa indicates time, and the ordinate expresses height (unit: m). The selected times are enclosed by red squares.}
\label{fig:example}
\end{figure*}

\end{document}
