# Supplementary figures and images for: Fast descent routes from within or near the stratosphere to the surface at Fukuoka, Japan, studied using 7 Be measurements and trajectory calculations
Source: Copernicus journal article supplement (doi:10.5194/acp-16-6241-2016), 2016-05-24

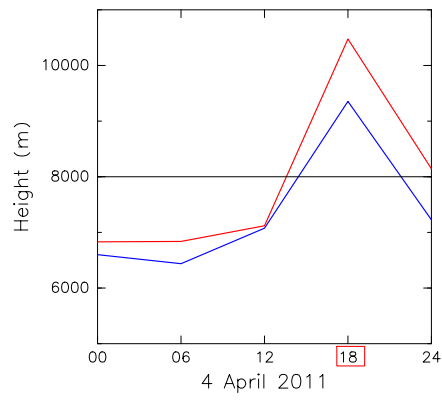

(a) one day (isolated)

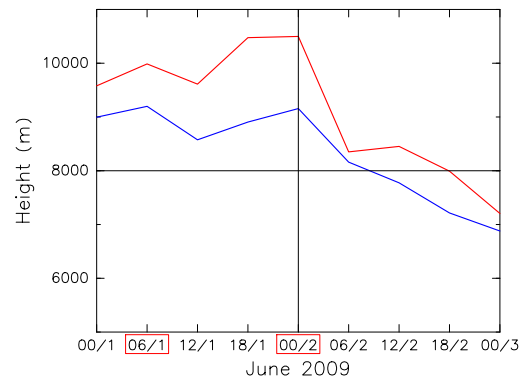

(b) one day (consecutive)

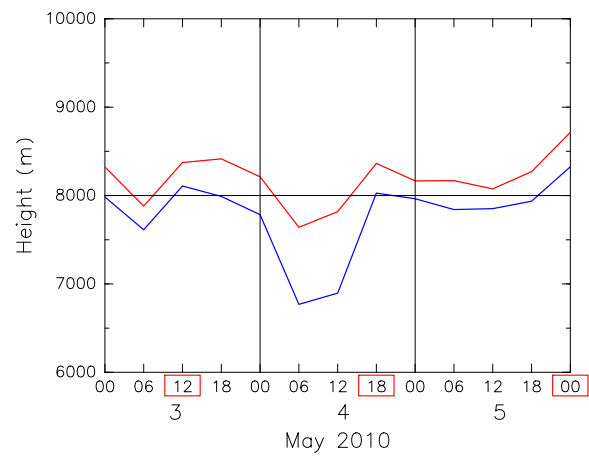

(c) three days

Supplement: Supplementary file 1 [file acp-16-6241-2016-supplement.zip › sup_figall.pdf]
